# Supplementary material
Source: publisher figshare collection journal article supplement (https://frontiersin.figshare.com/ndownloader/files/26740637)
Supplement: Supplementary file 1 [file 26740637]

Supplementary Material

# Supplementary Data


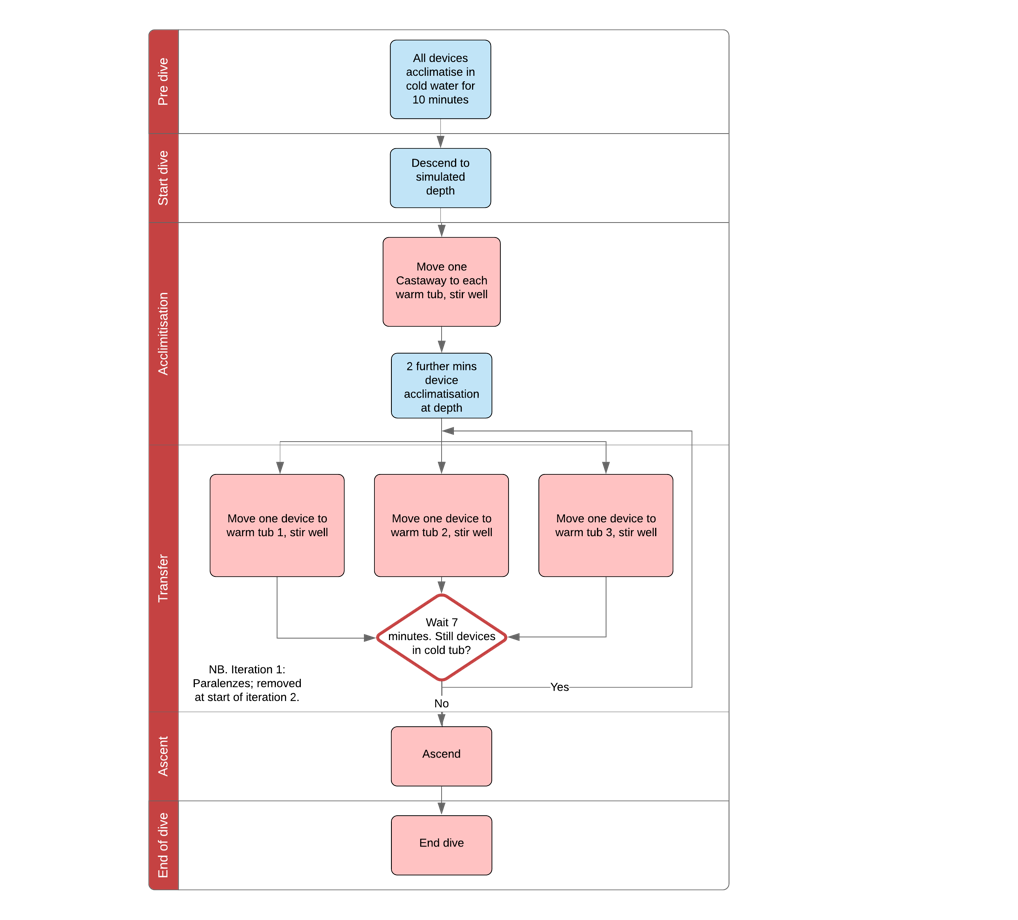


Fig 1: Schematic showing device movement in chamber dives for time constant.


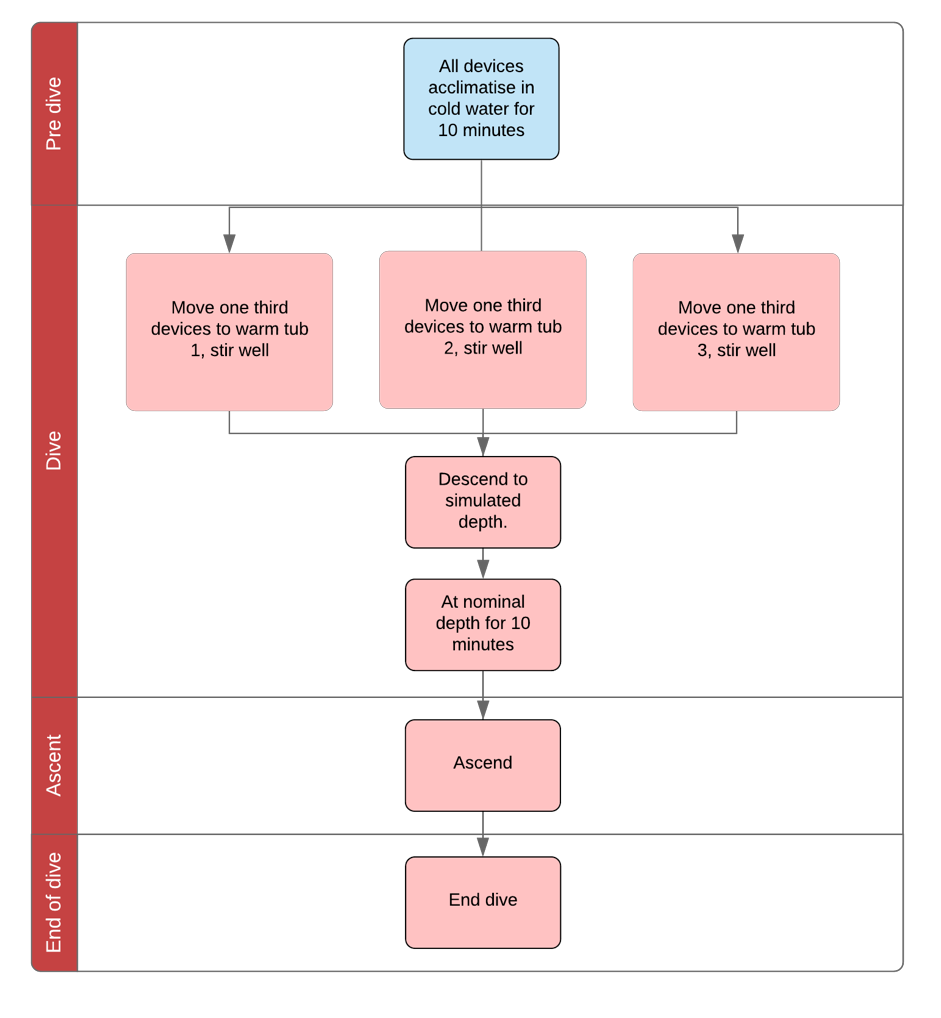


Fig 2: Schematic showing device movement in chamber dives for accuracy.

Table 1: Device sizes and pressure sensor locations

| Model | Front view | Pressure sensor location |
| --- | --- | --- |
| Aqualung i750TC | 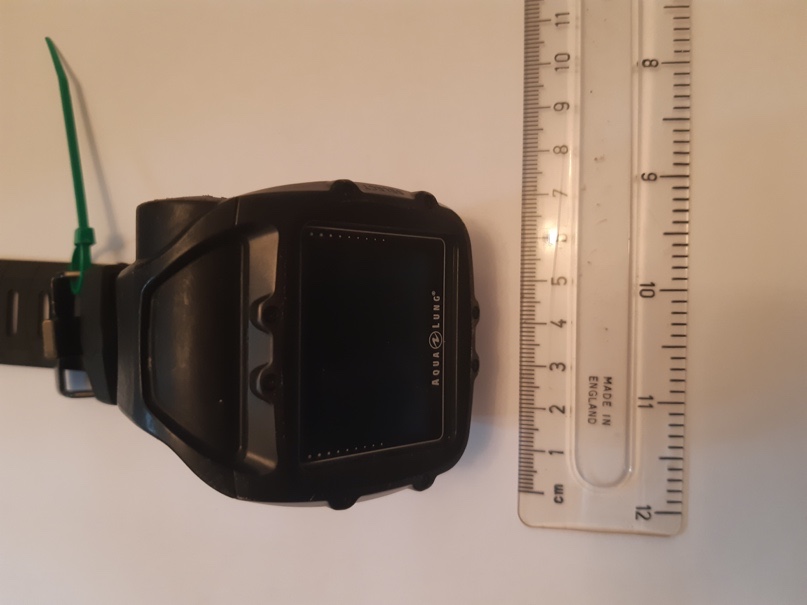 | 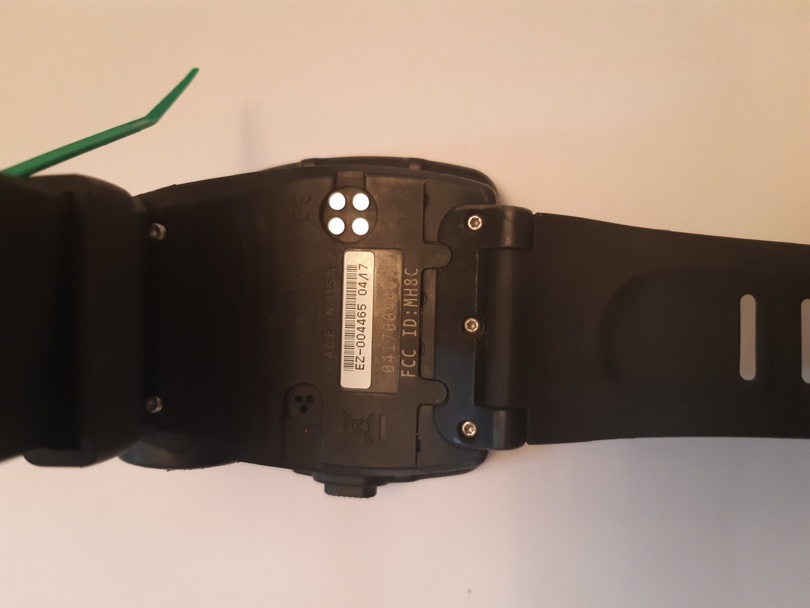 |
| Garmin Descent Mk1 | 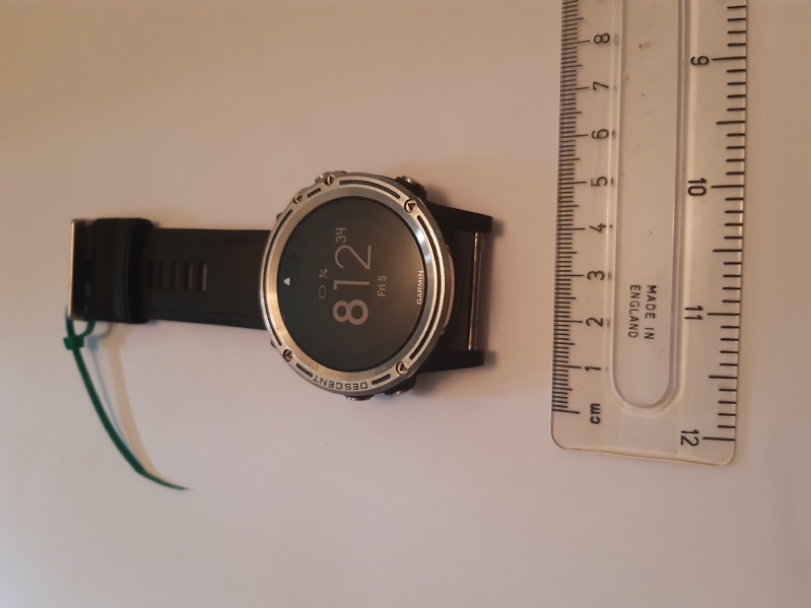 | 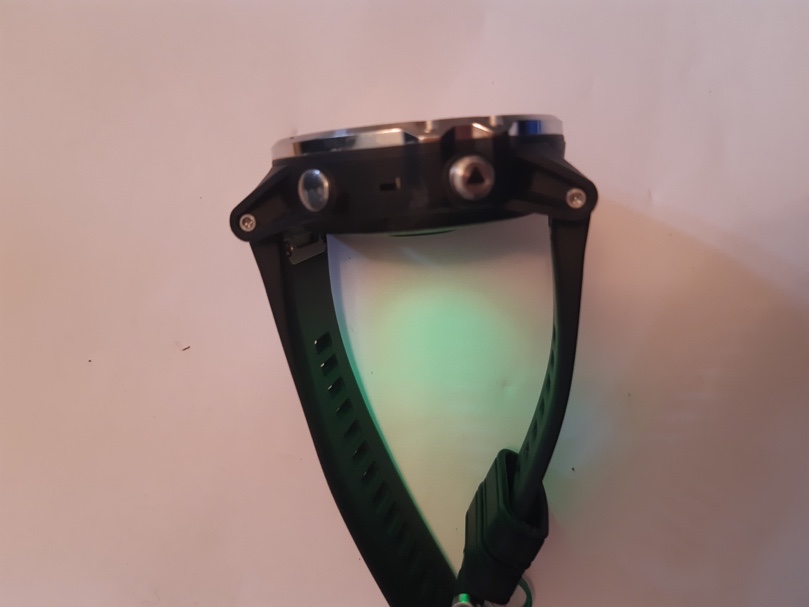 |
| Mares Matrix | 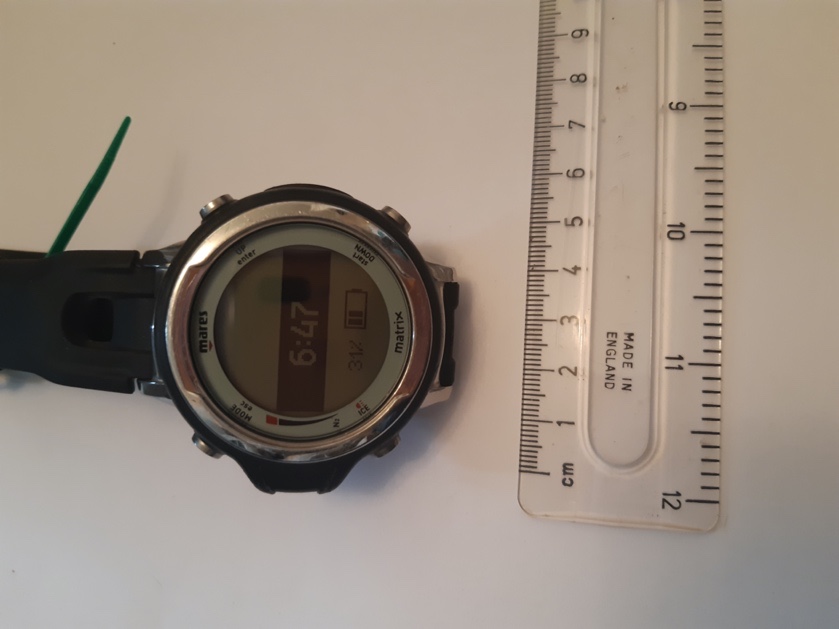 | 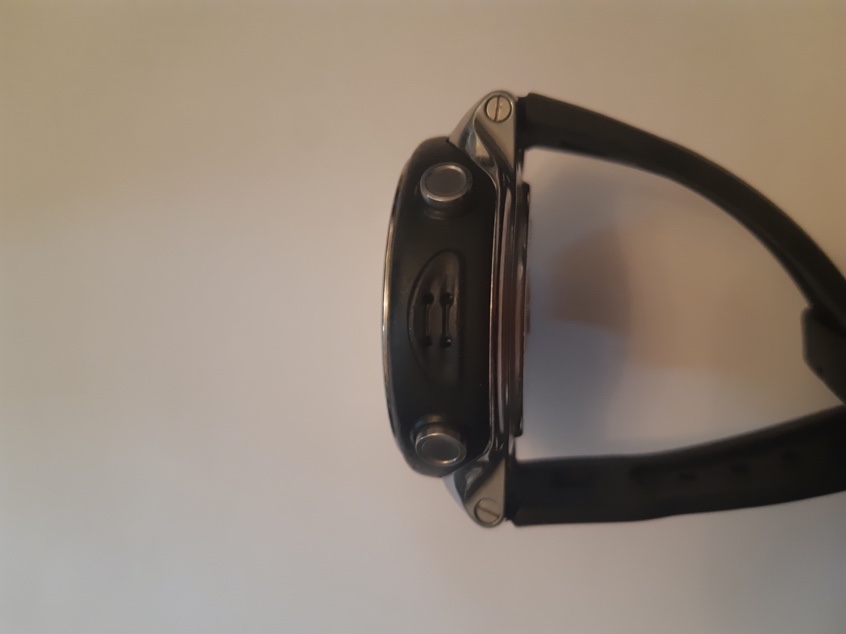 |
| Mares Puck Pro | 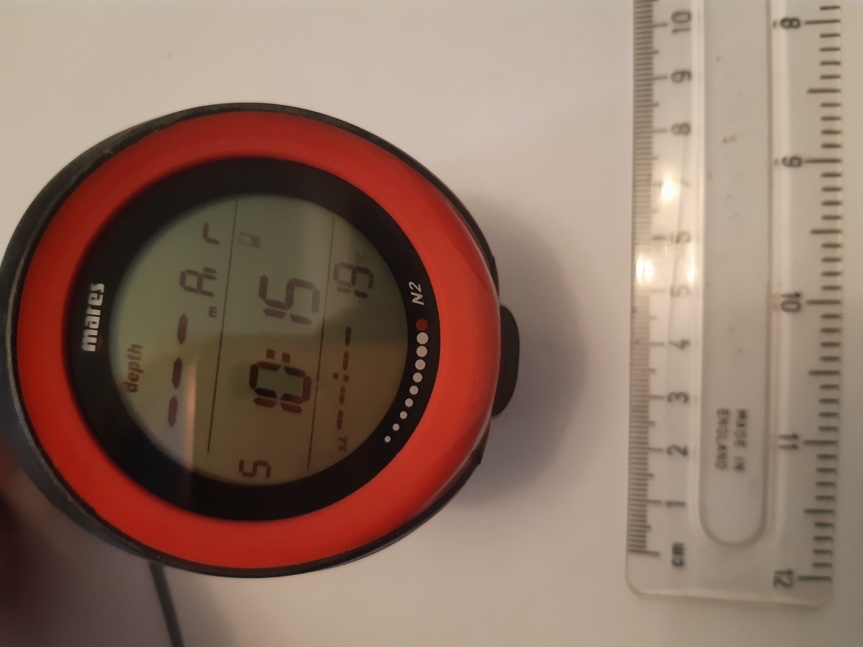 | 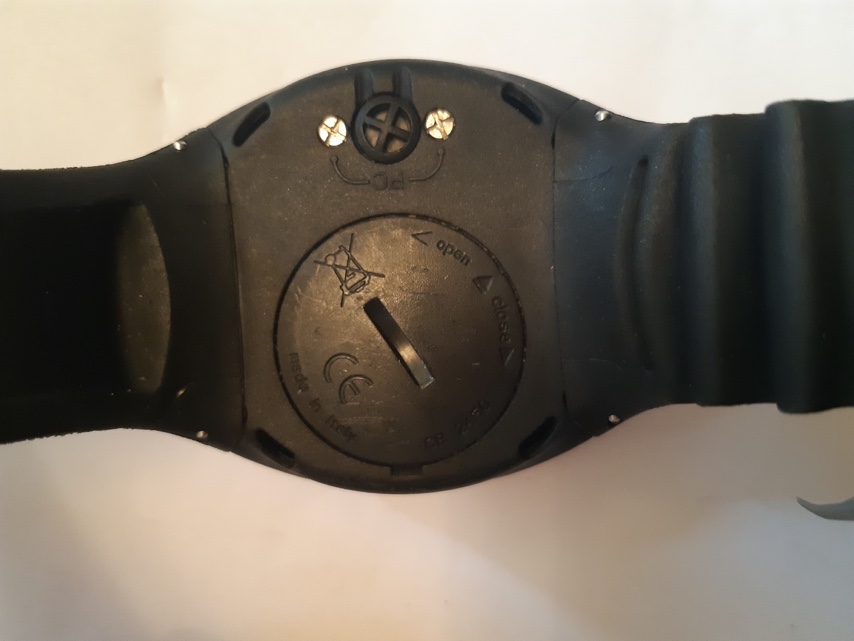 |
| Paralenz Dive Camera+ | 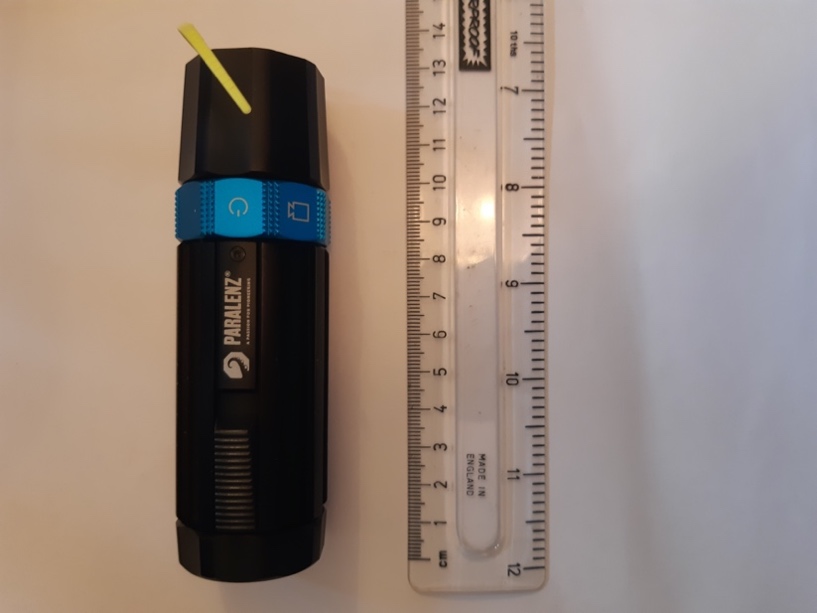 | 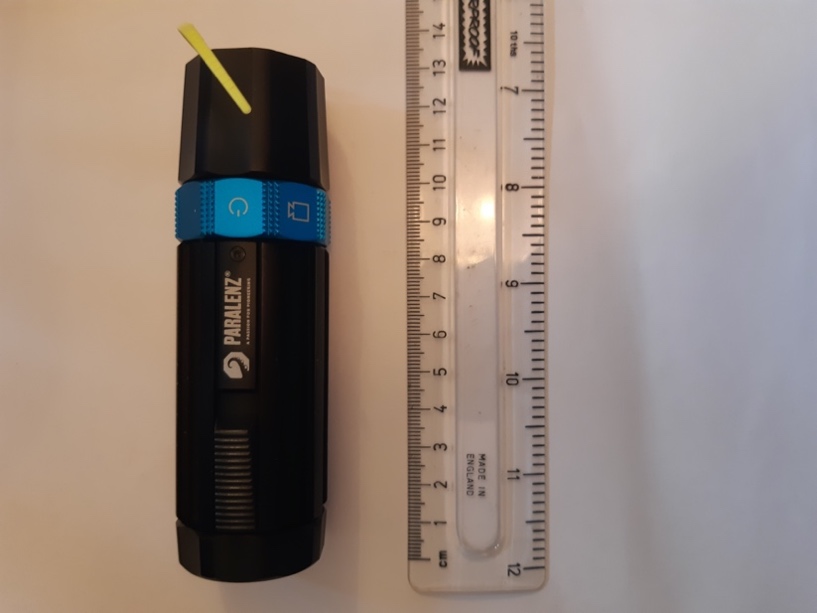  Underneath pull switch |
| Ratio iX3M GPS Deep | 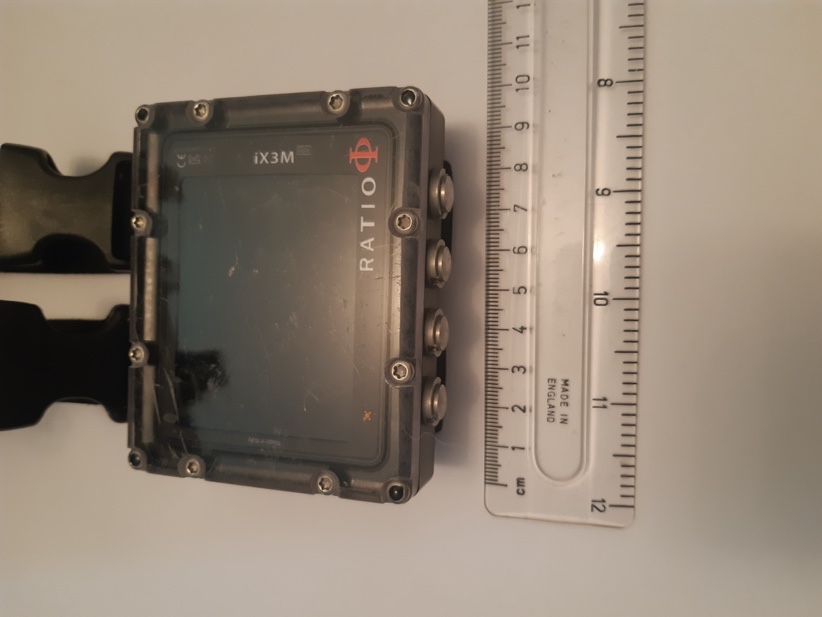 | 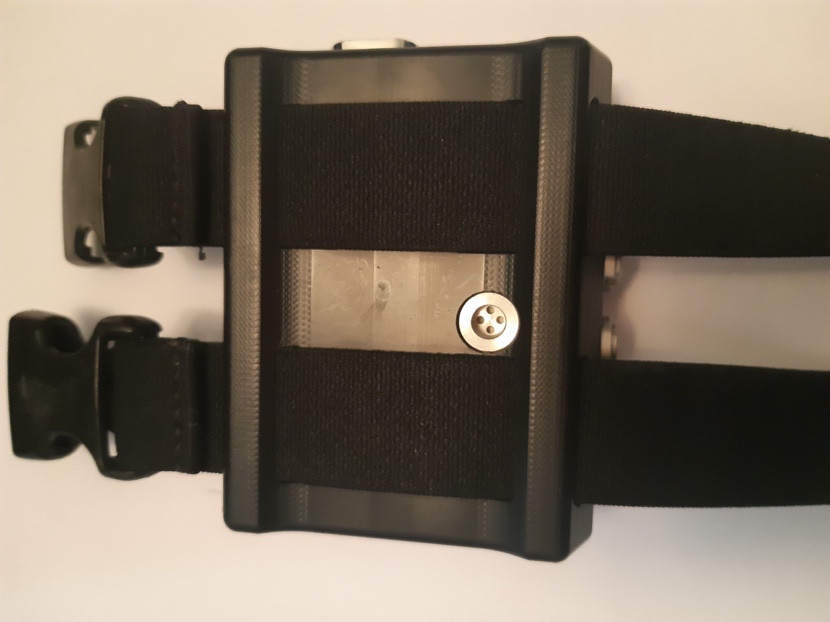 |
| Scubapro G2 | 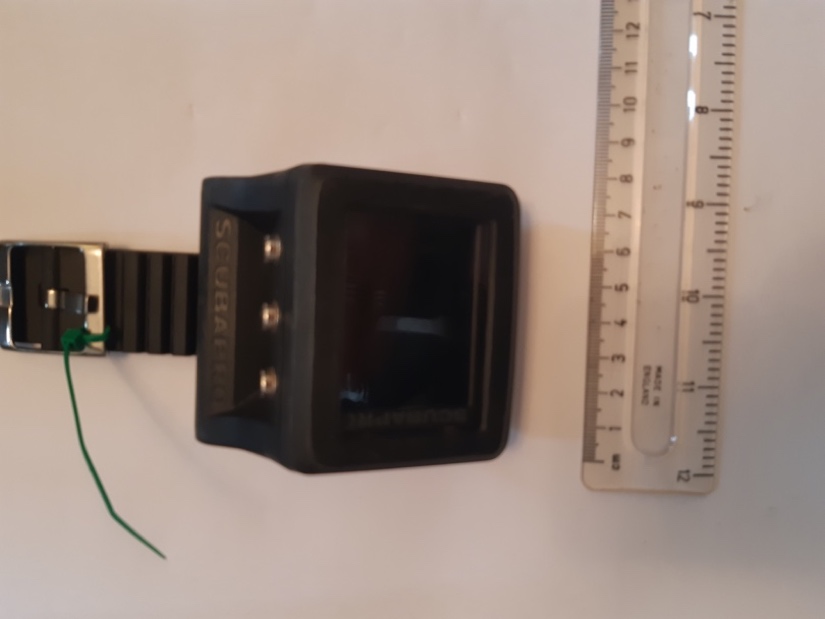 | 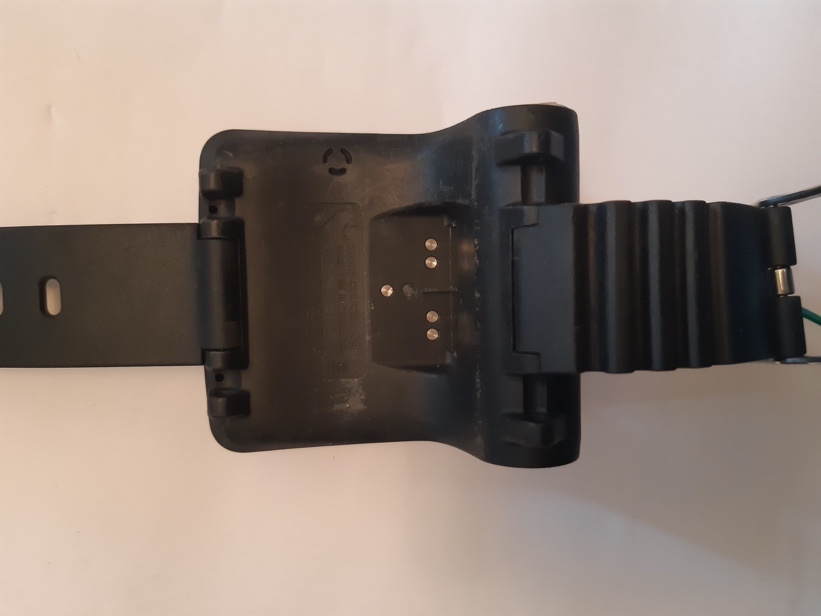 |
| Shearwater Perdix | 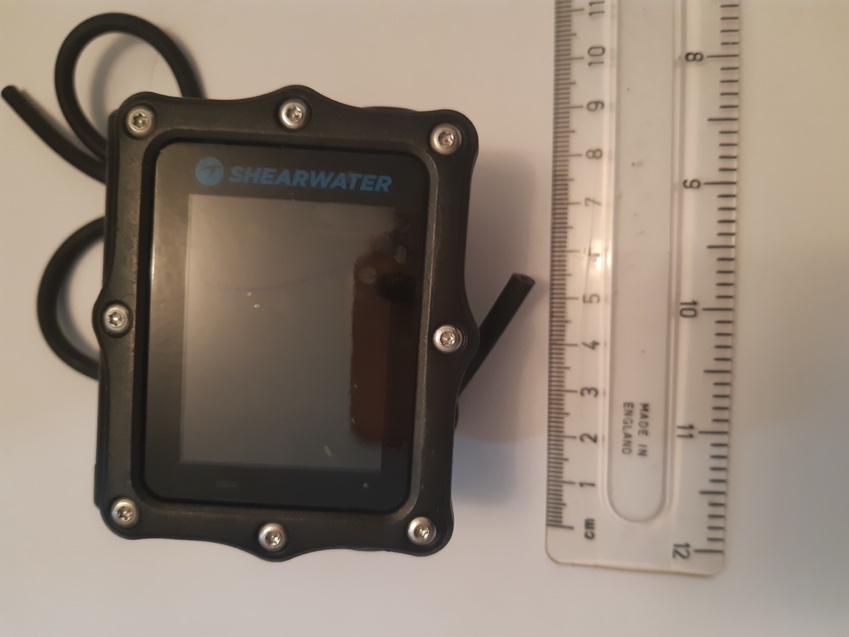 | 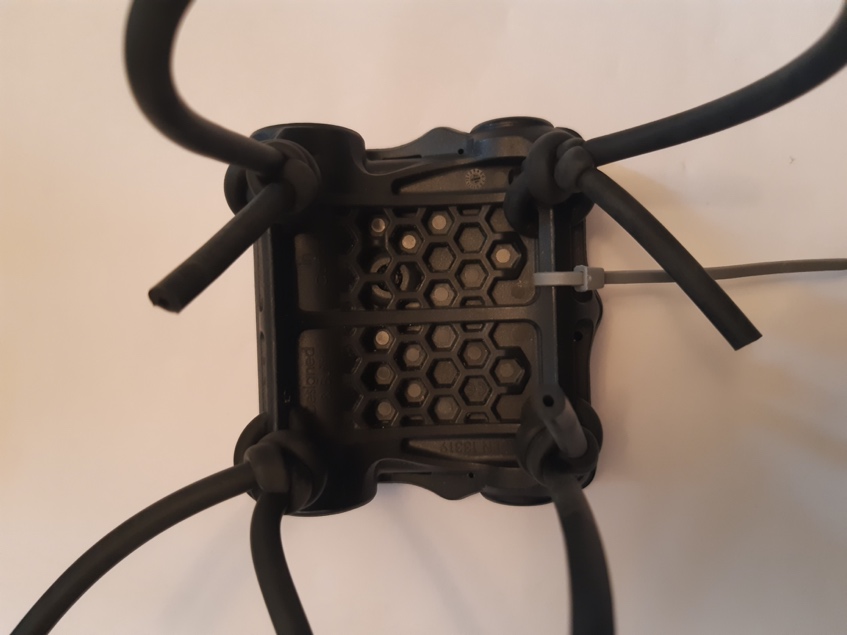 |
| Suunto D4i | 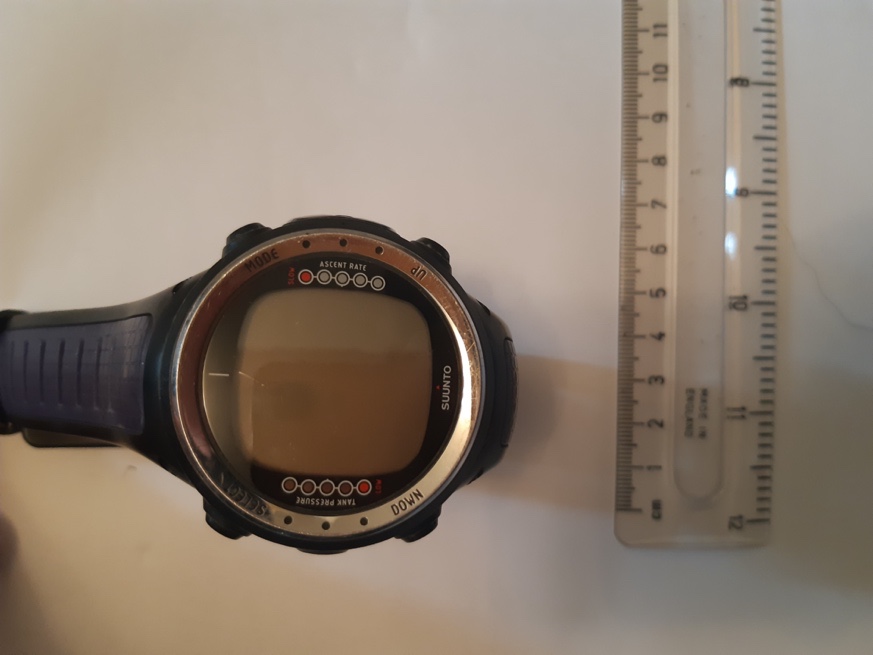 | 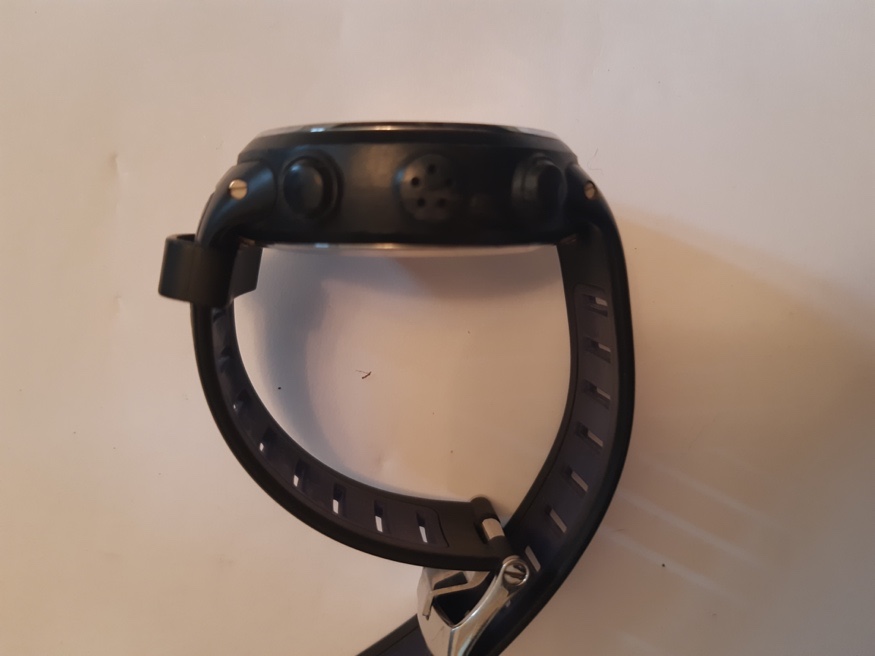 |
| Suunto D6i | 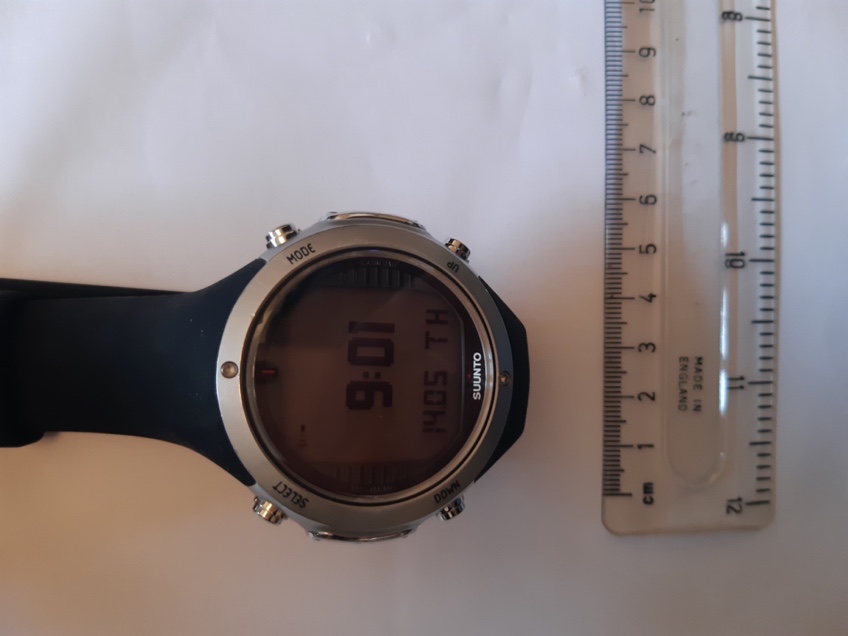 | 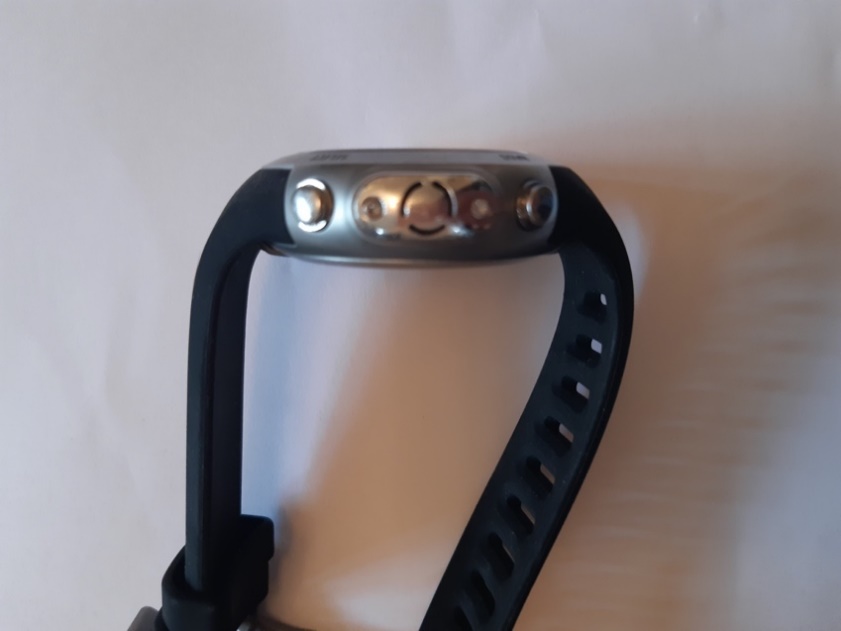 |
| Suunto EON Steel | 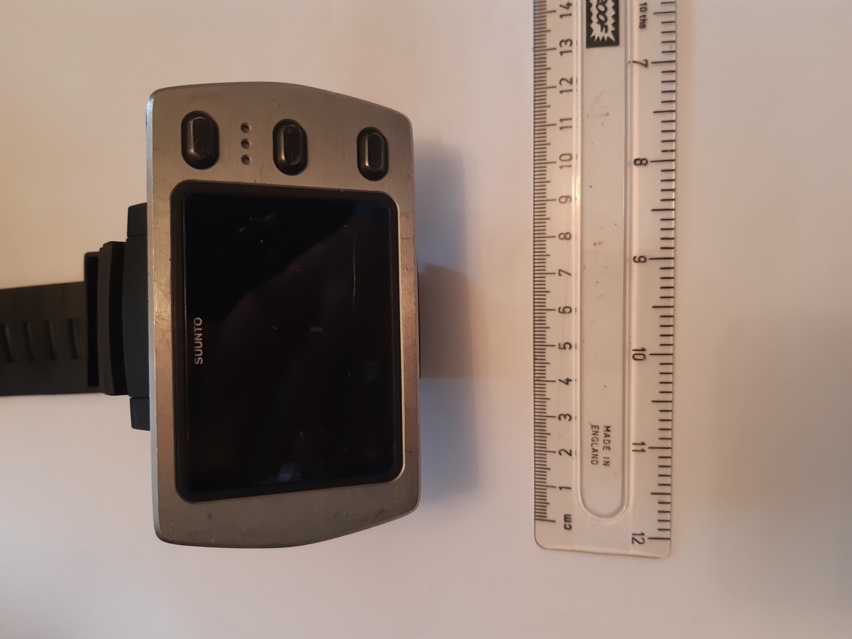 | 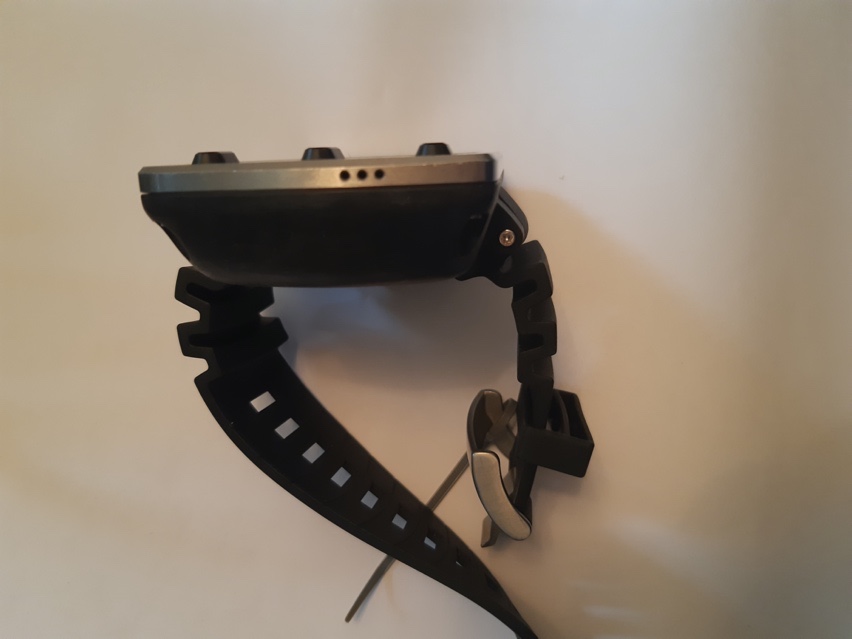 |
| Suunto Vyper | 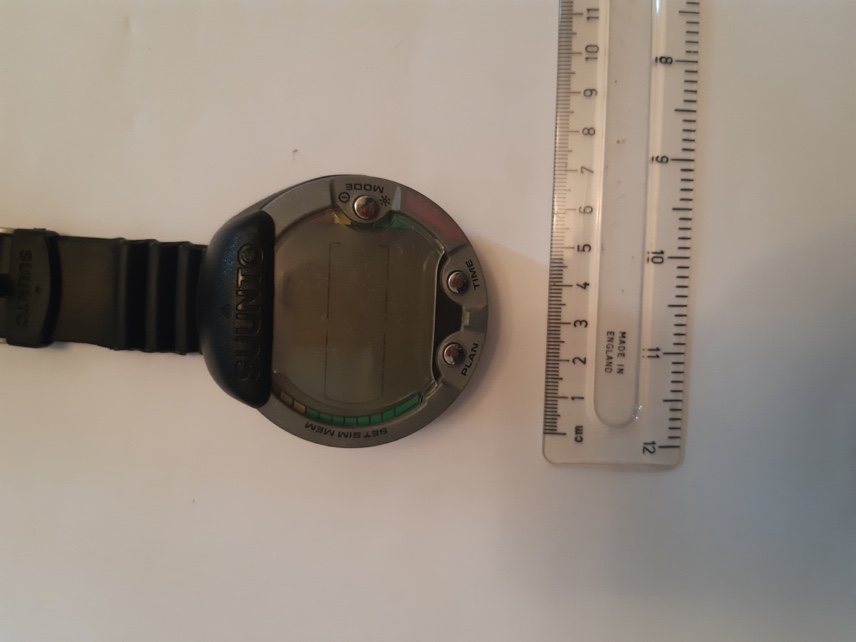 | 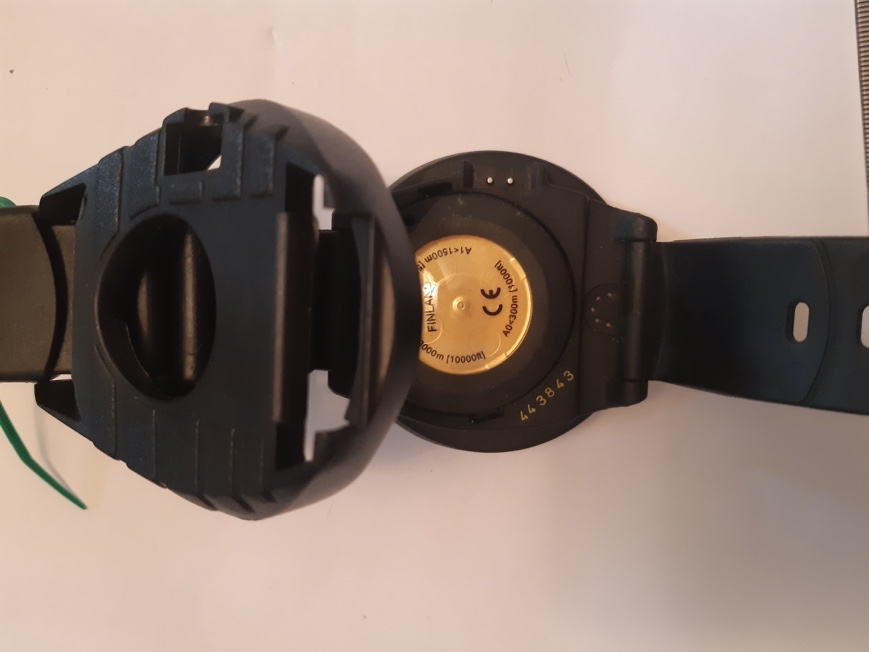 |


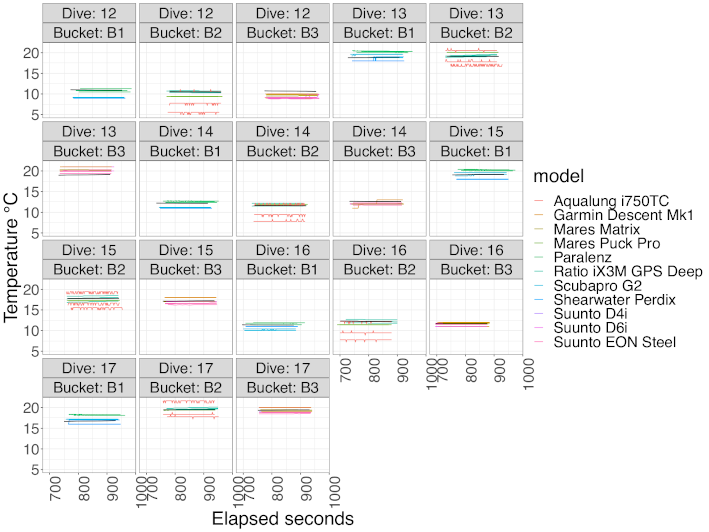


Fig 3: Mean device temperature as function of time during the final 180 s at >2.5 m by dive and bucket. NB. Devices in different buckets, but same dive, are not comparable in this plot due to different baseline bucket temperatures.


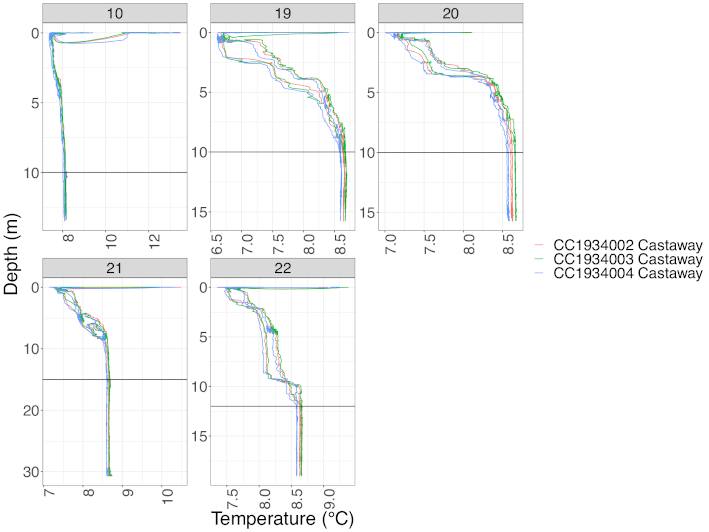


Fig 4: Castaway data for Oban sea dives; horizontal lines showing the cut off depth (top of the bottom mixed layer) for each dive. Baseline temperature for comparison was calculated from the mean temperature from the final 180 seconds of temperature data below this depth.


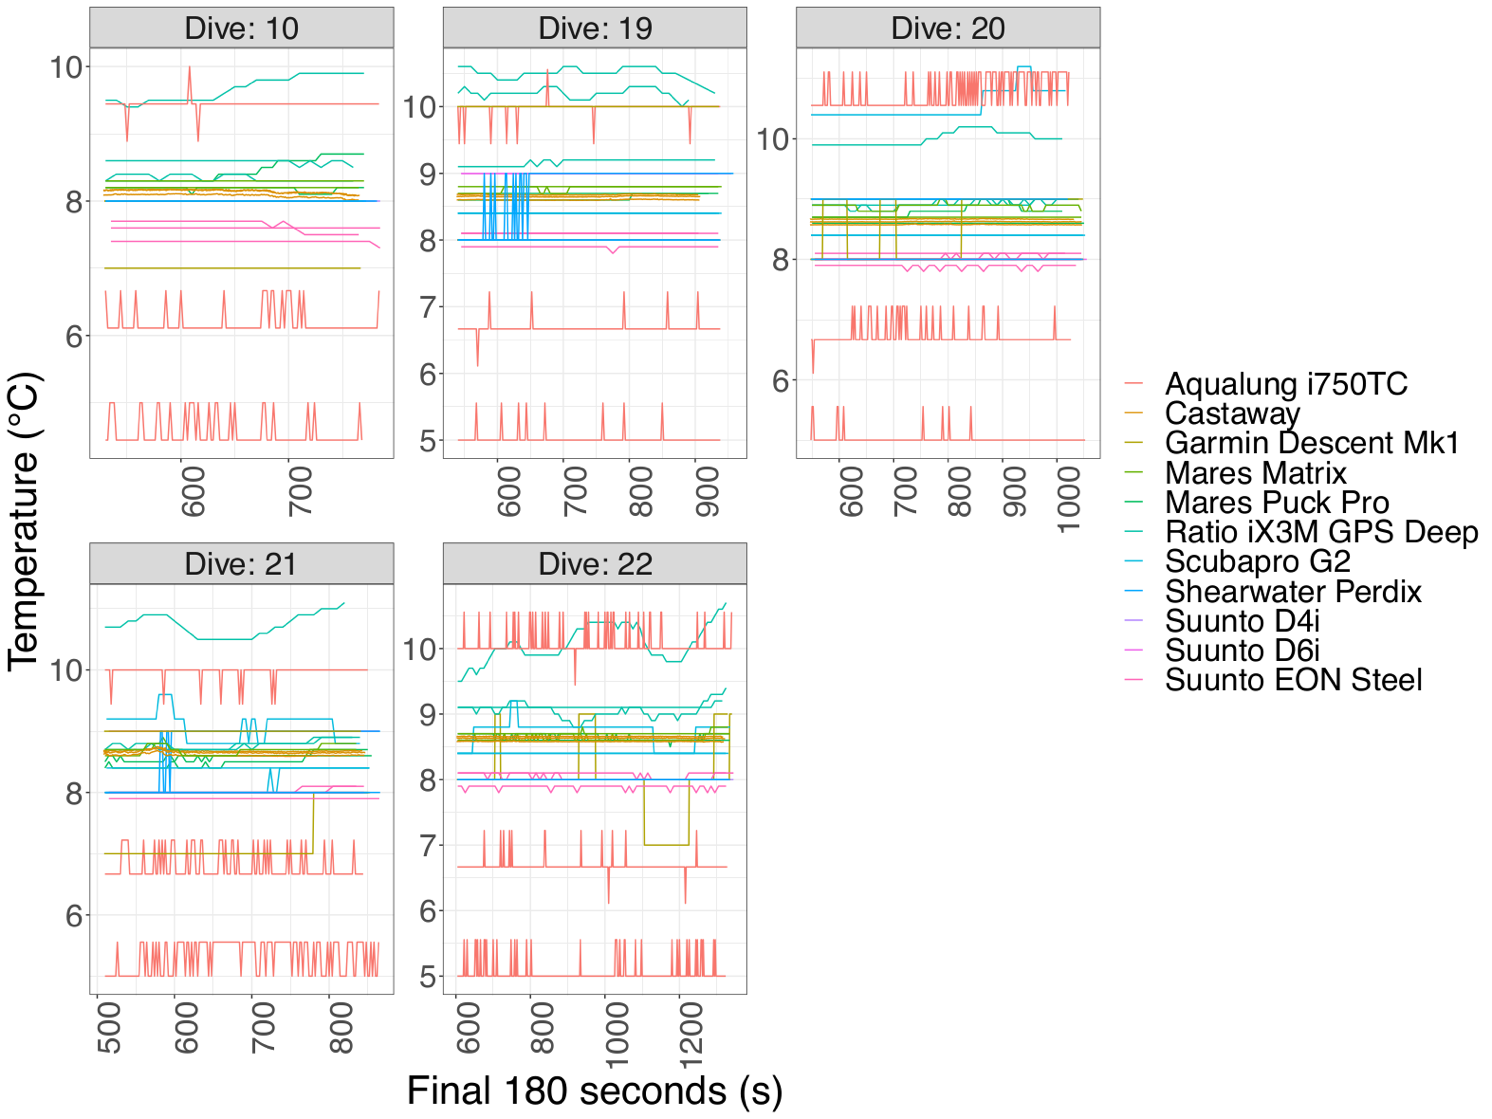


Fig 5: Final 180 s data below cut off depth by device. Bias was calculated as mean temperature across this time period, contrasted with the mean Castaway temperature from the same depth/time period.

Table 2: Mean response time (*τ*), by model.

| Model | n(dives) | *τ*mean / s | sd(*τ* ) | Classification (*τ*) |
| --- | --- | --- | --- | --- |
| Aqualung i750TC | 20 | 151 | 11 | Slow |
| Garmin Descent Mk1 | 25 | 48 | 9 | Quick |
| Mares Matrix | 18 | 46 | 5 | Quick |
| Mares Puck Pro | 18 | 111 | 5 | Intermediate |
| Paralenz Dive Camera+ | 16 | 22 | 3 | Quick |
| Scubapro G2 | 27 | 73 | 8 | Intermediate |
| Shearwater Perdix | 25 | 304 | 45 | Slow |
| Suunto D4i | 7 | 46 | 5 | Quick |
| Suunto D6i | 27 | 18 | 5 | Quick |
| Suunto EON Steel | 27 | 42 | 5 | Quick |

Table 3: Mean response time (τ), by device. S(τ fit) represents 95 % confidence intervals in the regression fit, based on the standard error of the regression.

| Model | Device ID | n(dives) | *τ*mean / s | sd(*τ* ) | S(*τ* *fit*) | Classification |
| --- | --- | --- | --- | --- | --- | --- |
| Aqualung i750TC | Aqualung 1 | 6 | 148 | 15 | 2±1 | Slow |
| Aqualung i750TC | Aqualung 2 | 7 | 149 | 7 | 2±1 | Slow |
| Aqualung i750TC | Aqualung 3 | 7 | 157 | 12 | 3±2 | Slow |
| Garmin Descent Mk1 | Garmin 3 | 7 | 44 | 4 | 1 | Quick |
| Garmin Descent Mk2 | Garmin 2 | 9 | 52 | 11 | 0.5±0.5 | Quick |
| Garmin Descent Mk3 | Garmin 1 | 9 | 46 | 8 | 0.5±0.5 | Quick |
| Mares Matrix | Mares Matrix 1 | 9 | 46 | 5 | 1.5±0.5 | Quick |
| Mares Matrix | Mares Matrix 2 | 9 | 46 | 6 | 1.5±0.5 | Quick |
| Mares Puck Pro | Mares Puck Pro 1 | 9 | 111 | 3 | 1.5±0.5 | Intermediate |
| Mares Puck Pro | Mares Puck Pro 2 | 9 | 112 | 7 | 2±1 | Intermediate |
| Paralenz Dive Camera+ | Paralenz 1 | 6 | 24 | 4 | 0.5±0.5 | Quick |
| Paralenz Dive Camera+ | Paralenz 2 | 6 | 20 | 2 | 0 | Quick |
| Paralenz Dive Camera+ | Paralenz 3 | 4 | 22 | 1 | 0 | Quick |
| Scubapro G2 | Scubapro 3 | 9 | 70 | 8 | 2.5±1.5 | Intermediate |
| Scubapro G3 | Scubapro 2 | 9 | 74 | 5 | 1.5±0.5 | Intermediate |
| Scubapro G4 | Scubapro 1 | 9 | 76 | 10 | 2.5±1.5 | Intermediate |
| Shearwater Perdix | Shearwater 1 | 9 | 291 | 45 | 2.5±2.5 | Slow |
| Shearwater Perdix | Shearwater 2 | 9 | 303 | 47 | 6±3 | Slow |
| Shearwater Perdix | Shearwater 3 | 7 | 322 | 45 | 5.5±2.5 | Slow |
| Suunto D4i | Suunto D4i 1 | 7 | 46 | 5 | 1.5±0.5 | Quick |
| Suunto D6i | Suunto D6i 1 | 9 | 18 | 4 | 4±4 | Quick |
| Suunto D6i | Suunto D6i 2 | 9 | 17 | 6 | 3.5±3.5 | Quick |
| Suunto D6i | Suunto D6i 3 | 9 | 20 | 6 | 2.5±2.5 | Quick |
| Suunto EON Steel | Suunto EON Steel 1 | 9 | 42 | 5 | 2±1 | Quick |
| Suunto EON Steel | Suunto EON Steel 2 | 9 | 41 | 3 | 2±1 | Quick |
| Suunto EON Steel | Suunto EON Steel 3 | 9 | 42 | 7 | 2.5±1.5 | Quick |

Table 4: Mean bias and uncertainties by model in water bath trials

| Model | Water bath | | |
| --- | --- | --- | --- |
|  | **n (dives)** | **Mean bias Δ*T*/ºC** | **sd (mean bias)** |
| Aqualung i750TC | 9 | -1 | 1.7 |
| Garmin Descent Mk1 | 9 | -0.7 | 0.5 |
| Mares Matrix | 6 | -0.8 | 0.4 |
| Mares Puck Pro | 6 | -1 | 0 |
| Paralenz Dive Camera+ | NA | NA | NA |
| Ratio iX3M GPS Deep | 9 | -0.2 | 0.4 |
| Scubapro G2 | 9 | 0 | 0 |
| Shearwater Perdix | 9 | -0.8 | 0.4 |
| Suunto D4i | 3 | -0.3 | 0.6 |
| Suunto D6i | 8 | 0 | 0 |
| Suunto EON Steel | 9 | -0.8 | 0.4 |
| Suunto Vyper | 6 | -0.7 | 0.5 |

Table 5: Mean bias and uncertainties by device in water bath trials

| Model | Device ID | Water bath | | |
| --- | --- | --- | --- | --- |
|  |  | **n (dives)** | **Mean bias**  **Δ*T*/ºC** | **sd (mean bias)** | |
| Aqualung i750TC | Aqualung 1 | 3 | -2.3 | 1.5 |
| Aqualung i750TC | Aqualung 2 | 3 | -1.7 | 0.6 |
| Aqualung i750TC | Aqualung 3 | 3 | 1 | 0 |
| Garmin Descent Mk1 | Garmin 1 | 3 | -1 | 0 |
| Garmin Descent Mk1 | Garmin 2 | 3 | -1 | 0 |
| Garmin Descent Mk1 | Garmin 3 | 3 | 0 | 0 |
| Mares Matrix | Mares Matrix 1 | 3 | -1 | 0 |
| Mares Matrix | Mares Matrix 2 | 3 | -0.7 | 0.6 |
| Mares Puck Pro | Mares Puck Pro 1 | 3 | -1 | 0 |
| Mares Puck Pro | Mares Puck Pro 2 | 3 | -1 | 0 |
| Paralenz Dive Camera+ | Paralenz 1 | NA | NA | NA |
| Paralenz Dive Camera+ | Paralenz 2 | NA | NA | NA |
| Paralenz Dive Camera+ | Paralenz 3 | NA | NA | NA |
| Ratio iX3M GPS Deep | Ratio 1 | 3 | -0.2 | 0.5 |
| Ratio iX3M GPS Deep | Ratio 2 | 3 | 0 | 0.3 |
| Ratio iX3M GPS Deep | Ratio 3 | 3 | -0.3 | 0.4 |
| Scubapro G2 | Scubapro 1 | 3 | 0 | 0 |
| Scubapro G2 | Scubapro 2 | 3 | 0 | 0 |
| Scubapro G2 | Scubapro 3 | 3 | 0 | 0 |
| Shearwater Perdix | Shearwater 1 | 3 | -0.7 | 0.6 |
| Shearwater Perdix | Shearwater 2 | 3 | -0.7 | 0.6 |
| Shearwater Perdix | Shearwater 3 | 3 | -1 | 0 |
| Suunto D4i | Suunto D4i 1 | 3 | -0.3 | 0.6 |
| Suunto D6i | Suunto D6i 1 | 3 | 0 | 0 |
| Suunto D6i | Suunto D6i 2 | 2 | 0 | 0 |
| Suunto D6i | Suunto D6i 3 | 3 | 0 | 0 |
| Suunto EON Steel | Suunto EON Steel 1 | 3 | -1 | 0 |
| Suunto EON Steel | Suunto EON Steel 2 | 3 | -0.7 | 0.6 |
| Suunto EON Steel | Suunto EON Steel 3 | 3 | -0.7 | 0.6 |
| Suunto Vyper | Suunto Vyper 1 | 3 | -0.7 | 0.6 |
| Suunto Vyper | Suunto Vyper 2 | 3 | -0.7 | 0.6 |

Table 6: Comparison of mean bias by device worn ‘on arm’ vs loose on a frame. Mean temperature derived from final 180 s sea dives below top of the mixed layer, compared to baseline Castaway temperature data over same time.

| Model | Device ID | ‘On frame’ mean Δ*T*/ºC | sd (‘on frame’ mean) | ‘On arm’ mean Δ*T*/ºC | sd (‘on arm’ mean) | Absolute difference  ΔT/ºC |
| --- | --- | --- | --- | --- | --- | --- |
| Aqualung i750TC | Aqualung 1 | -3.6 | 0 | -3.5 | 0.2 | 0.1 |
| Aqualung i750TC | Aqualung 2 | -1.9 | 0.1 | -1.9 | 0 | 0 |
| Aqualung i750TC | Aqualung 3 | 1.3 | 0.1 | 1.7 | 0.6 | 0.4 |
| Garmin Descent Mk1 | Garmin 1 | -0.5 | 0.3 | -0.1 | 0.5 | 0.4 |
| Garmin Descent Mk1 | Garmin 2 | -0.9 | 0.2 | -0.9 | 0.2 | 0 |
| Garmin Descent Mk1 | Garmin 3 | 0 | 0.4 | 0.6 | 0.6 | 0.6 |
| Mares Matrix | Mares Matrix 1 | 0.1 | 0.1 | 0.1 | 0.1 | 0 |
| Mares Matrix | Mares Matrix 2 | 0.1 | 0 | 0.2 | 0.1 | 0.1 |
| Mares Puck Pro | Mares Puck Pro 1 | 0.1 | 0.1 | 0.3 | 0.4 | 0.2 |
| Mares Puck Pro | Mares Puck Pro 2 | 0 | 0.1 | 0 | 0.1 | 0 |
| Ratio iX3M GPS Deep | Ratio 1 | 0.8 | 0.5 | 1.9 | 0.4 | 1.1 |
| Ratio iX3M GPS Deep | Ratio 2 | 0.3 | 0.1 | 2.3 | 2.3 | 2 |
| Ratio iX3M GPS Deep | Ratio 3 | 0.4 | 0.1 | 1.9 | 0.5 | 1.5 |
| Scubapro G2 | Scubapro 1 | -0.3 | 0 | 0.7 | 1.4 | 1 |
| Scubapro G2 | Scubapro 2 | -0.2 | 0.1 | -0.2 | 0.1 | 0 |
| Scubapro G2 | Scubapro 3 | -0.2 | 0.1 | 0.1 | 0.4 | 0.3 |
| Shearwater Perdix | Shearwater 1 | -0.4 | 0.4 | 0.2 | 0.2 | 0.6 |
| Shearwater Perdix | Shearwater 2 | -0.4 | 0.3 | 0 | 0.5 | 0.4 |
| Shearwater Perdix | Shearwater 3 | -0.7 | 0.1 | -0.1 | 0.5 | 0.6 |
| Suunto D4i | Suunto D4i 1 | -0.7 | 0.1 | -0.4 | 0.3 | 0.3 |
| Suunto D6i | Suunto D6i 1 | -0.4 | 0.3 | 0 | 0.5 | 0.4 |
| Suunto D6i | Suunto D6i 2 | -0.4 | 0.4 | -0.1 | 0.5 | 0.3 |
| Suunto D6i | Suunto D6i 3 | -0.4 | 0.3 | 0 | 0.5 | 0.4 |
| Suunto EON Steel | Suunto EON Steel 1 | -0.8 | 0 | -0.7 | 0 | 0.1 |
| Suunto EON Steel | Suunto EON Steel 2 | -0.6 | 0 | -0.5 | 0.1 | 0.1 |
| Suunto EON Steel | Suunto EON Steel 3 | -0.6 | 0 | -0.6 | 0 | 0 |
| Suunto Vyper | Suunto Vyper 1 | -0.4 | 0.4 | -0.1 | 0.5 | 0.3 |
| Suunto Vyper | Suunto Vyper 2 | -0.4 | 0.3 | -0.1 | 0.5 | 0.3 |

Table 7: Total mean bias by device across sea and chamber dives

| Model | Device ID | n(dives) | Mean bias Δ*T*/ºC | Absolute mean bias Δ*T*/ºC | sd (mean bias) Δ*T*/ºC |
| --- | --- | --- | --- | --- | --- |
| Aqualung i750TC | Aqualung 1 | 11 | -3.4 | 3.4 | 1 |
| Aqualung i750TC | Aqualung 2 | 11 | -1.9 | 1.9 | 0.5 |
| Aqualung i750TC | Aqualung 3 | 11 | 1.2 | 1.2 | 0.7 |
| Garmin Descent Mk1 | Garmin 1 | 11 | 0 | 0 | 0.6 |
| Garmin Descent Mk1 | Garmin 2 | 11 | -0.7 | 0.7 | 0.7 |
| Garmin Descent Mk1 | Garmin 3 | 11 | 0.3 | 0.3 | 0.8 |
| Mares Matrix | Mares Matrix 1 | 11 | -0.1 | 0.1 | 0.4 |
| Mares Matrix | Mares Matrix 2 | 11 | 0 | 0 | 0.6 |
| Mares Puck Pro | Mares Puck Pro 1 | 11 | -0.1 | 0.1 | 0.6 |
| Mares Puck Pro | Mares Puck Pro 2 | 11 | -0.1 | 0.1 | 0.6 |
| Paralenz Dive Camera+ | Paralenz 1 | 10 | 0.6 | 0.6 | 0.5 |
| Paralenz Dive Camera+ | Paralenz 2 | 10 | 0.8 | 0.8 | 0.5 |
| Paralenz Dive Camera+ | Paralenz 3 | 9 | 0.8 | 0.8 | 0.3 |
| Ratio iX3M GPS Deep | Ratio 1 | 11 | 0.8 | 0.8 | 0.6 |
| Ratio iX3M GPS Deep | Ratio 2 | 11 | 0.1 | 0.1 | 0.6 |
| Ratio iX3M GPS Deep | Ratio 3 | 11 | 0.4 | 0.4 | 0.6 |
| Scubapro G2 | Scubapro 1 | 11 | -0.2 | 0.2 | 1 |
| Scubapro G2 | Scubapro 2 | 11 | -0.3 | 0.3 | 0.8 |
| Scubapro G2 | Scubapro 3 | 11 | -0.3 | 0.3 | 0.7 |
| Shearwater Perdix | Shearwater 1 | 11 | -0.6 | 0.6 | 0.7 |
| Shearwater Perdix | Shearwater 2 | 11 | -0.6 | 0.6 | 0.6 |
| Shearwater Perdix | Shearwater 3 | 11 | -0.7 | 0.7 | 0.6 |
| Suunto D4i | Suunto D4i 1 | 11 | -0.5 | 0.5 | 0.6 |
| Suunto D6i | Suunto D6i 1 | 11 | -0.2 | 0.2 | 0.9 |
| Suunto D6i | Suunto D6i 2 | 11 | -0.3 | 0.3 | 0.7 |
| Suunto D6i | Suunto D6i 3 | 11 | -0.3 | 0.3 | 0.7 |
| Suunto EON Steel | Suunto EON Steel 1 | 11 | -0.7 | 0.7 | 0.7 |
| Suunto EON Steel | Suunto EON Steel 2 | 11 | -0.4 | 0.4 | 0.4 |
| Suunto EON Steel | Suunto EON Steel 3 | 11 | -0.5 | 0.5 | 0.5 |
| Suunto Vyper | Suunto Vyper 1 | 11 | -0.3 | 0.3 | 1.6 |
| Suunto Vyper | Suunto Vyper 2 | 11 | -0.2 | 0.2 | 2.6 |

Table 8: Model classification. Accuracy and precision across sea & chamber conditions, overall, plus response to temperature change

| Model | Accuracy (sea) | Precision (sea) | Accuracy (chamber) | Precision (chamber) | Accuracy (overall) | Precision (overall) | Classification (*τ*) |
| --- | --- | --- | --- | --- | --- | --- | --- |
| Aqualung i750TC | Poor | Poor | Poor | Poor | Poor | Poor | Slow |
| Garmin Descent Mk1 | Good | Moderate | Good | Moderate | Good | Moderate | Quick |
| Mares Matrix | Good | Good | Good | Moderate | Good | Good | Quick |
| Mares Puck Pro | Good | Good | Good | Moderate | Good | Moderate | Intermediate |
| Paralenz Dive Camera+ | Moderate | Good | Moderate | Moderate | Moderate | Good | Quick |
| Ratio iX3M GPS Deep | Moderate | Moderate | Good | Good | Good | Moderate | Excluded from analysis |
| Scubapro G2 | Good | Moderate | Good | Moderate | Good | Moderate | Intermediate |
| Shearwater Perdix | Good | Good | Moderate | Moderate | Moderate | Moderate | Slow |
| Suunto D4i | Good | Good | Good | Moderate | Good | Moderate | Quick |
| Suunto D6i | Good | Good | Good | Moderate | Good | Moderate | Quick |
| Suunto EON Steel | Moderate | Good | Good | Moderate | Good | Moderate | Quick |
| Suunto Vyper | Good | Good | Good | Poor | Good | Poor | N/A |
